# Supplementary material for: Halogenated two-dimensional germanium: candidate materials for being of Quantum Spin Hall state
Source: Royal Society of Chemistry journal article supplement (doi:10.1039/c2jm30960b), 2012-01-01
Supplement: c2jm30960b.pdf [file c2jm30960b.pdf]

## Supporting information for

### Halogenated Two-Dimensional Germanium: Candidate Materials Being of Quantum Spin Hall State

Yandong Ma, Ying Dai\*, Chengwang Niu, and Baibiao Huang

School of Physics, State Key Laboratory of Crystal Materials, Shandong University,

Jinan 250100, People's Republic of China

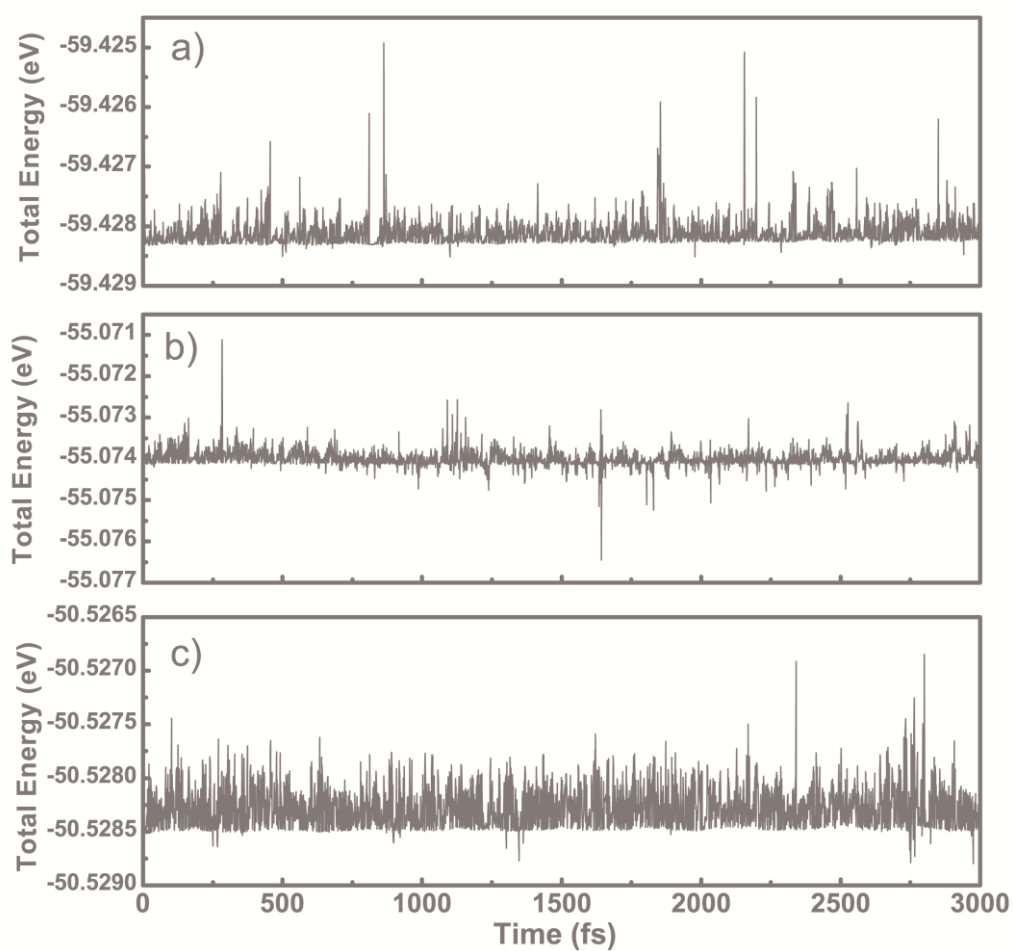

**Figure S1.** Changes of energy with time obtained from molecular dynamics simulations of Cl-germanene (a), Br-germanene (b) and I-germanene (c).
